# Supplementary material for: A Mixture of Essential Oils from Three Cretan Aromatic Plants Inhibits SARS-CoV-2 Proliferation: A Proof-of-Concept Intervention Study in Ambulatory Patients
Source: MDPI journal article supplement (doi:10.3390/diseases11030105), 2023-08-09
Supplement: s1 [file s1]

## Supplement Tables

**Table S1.** Descriptive characteristics of the 69 patients in two Interventions & one Control groups.

|                                                                                                                                                                                |                        | Groups                       |                                 |                            |
|--------------------------------------------------------------------------------------------------------------------------------------------------------------------------------|------------------------|------------------------------|---------------------------------|----------------------------|
|                                                                                                                                                                                |                        | Intervention <sup>2020</sup> | Intervention <sup>2021/22</sup> | Control <sup>2021/22</sup> |
|                                                                                                                                                                                |                        | (n=13)                       | (n=25)                          | (n=31)                     |
|                                                                                                                                                                                |                        | n (%)                        |                                 |                            |
| <b>Gender</b>                                                                                                                                                                  | <i>males</i>           | 8 (61.5)                     | 10 (40.0)                       | 14 (45.2)                  |
|                                                                                                                                                                                | <i>females</i>         | 5 (38.5)                     | 15 (60.0)                       | 17 (54.8)                  |
| <b>Age, years</b>                                                                                                                                                              | <i>mean age±s.d.</i>   | 36.4±11.7                    | 39.5±13.5                       | 42.1±16.1                  |
| <b>Family members</b>                                                                                                                                                          | <i>yes</i>             | 4 (30.8)                     | 7 (28.0)                        | 15 (48.4)                  |
| <b>Smokers</b>                                                                                                                                                                 | <i>non</i>             | 8 (61.5)                     | 14 (56.0)                       | 13 (42.0)                  |
|                                                                                                                                                                                | <i>former</i>          | 2 (15.4)                     | 1 (4.0)                         | 9 (29.0)                   |
|                                                                                                                                                                                | <i>current</i>         | 3 (23.1)                     | 10 (40.0)                       | 9 (29.0)                   |
| <b>Morbidity</b> (at least one chronic disease)                                                                                                                                | <i>yes<sup>a</sup></i> | 4 (30.8)                     | 10 (40.0)                       | 9 (29.0)                   |
| <b>Recurrence of Covid-19</b> (in last six months)                                                                                                                             | <i>yes</i>             | --                           | --                              | 1 (3.2)                    |
| <b>Vaccination for SARS-CoV-2</b> (doses)                                                                                                                                      | <i>none</i>            | --                           | 19 (50.0)                       | 11 (35.5)                  |
|                                                                                                                                                                                | <i>one</i>             | --                           | 5 (13.2)                        | 3 (9.7)                    |
|                                                                                                                                                                                | <i>two</i>             | --                           | 10 (26.3)                       | 14 (45.2)                  |
|                                                                                                                                                                                | <i>three</i>           | --                           | 4 (10.5)                        | 3 (9.7)                    |
| <b>Administration/intake of medicinal or other compound for the symptoms</b> (before, at the point of or following inclusion to the study, additionally to CA <sub>Peo</sub> ) | <i>painkillers</i>     | 3 (23.1)                     | 13 (52.0)                       | 19 (61.3)                  |
|                                                                                                                                                                                | <i>antibiotics</i>     | 3 (23.1)                     | 1 (4.0)                         | --                         |

<sup>a</sup> Includes nineteen different groups of diseases e.g. hypertension, diabetes mellitus, heart disease, cancer etc.

**Table S2.** Mean changes in the number and severity of symptoms between two Interventions and one Control group at 7<sup>th</sup> and 14<sup>th</sup> days in relation to baseline (1<sup>st</sup> record day).

|                 |                                                   | Groups                       |                                 |                            | p-value | η <sup>2</sup> |
|-----------------|---------------------------------------------------|------------------------------|---------------------------------|----------------------------|---------|----------------|
|                 |                                                   | Intervention <sup>2020</sup> | Intervention <sup>2021/22</sup> | Control <sup>2021/22</sup> |         |                |
| Symptoms        | Days of follow-up                                 | mean (stand.dev.)            |                                 |                            |         |                |
| <b>Number</b>   | 1 <sup>st</sup> (baseline)                        | 4.3 (2.0)                    | 4.8 (2.3)                       | 4.0 (2.1)                  |         |                |
|                 | 7 <sup>th</sup>                                   | 0.9 (1.7)                    | 1.6 (1.9)                       | 3.1 (3.1)                  |         |                |
|                 | Δ-change (7 <sup>th</sup> from 1 <sup>st</sup> )  | -3.4                         | -3.2                            | -0.9                       | 0.002   | 0.15           |
|                 | 14 <sup>th</sup>                                  | 0.3 (0.8)                    | 0.6 (1.2)                       | 1.1 (1.7)                  |         |                |
|                 | Δ-change (14 <sup>th</sup> from 7 <sup>th</sup> ) | -0.5                         | -1.0                            | -2.0                       | 0.011   | 0.11           |
| <b>Severity</b> | Δ-change (14 <sup>th</sup> from 1 <sup>st</sup> ) | -4.0                         | -4.2                            | -2.9                       | 0.063   | 0.05           |
|                 | 1 <sup>st</sup> (baseline)                        | 10.0 (5.5)                   | 12.0 (6.2)                      | 9.5 (5.2)                  |         |                |
|                 | 7 <sup>th</sup>                                   | 2.0 (2.9)                    | 4.2 (5.4)                       | 8.1 (8.3)                  |         |                |
|                 | Δ-change (7 <sup>th</sup> from 1 <sup>st</sup> )  | -8.0                         | -7.8                            | -1.4                       | 0.006   | 0.12           |
|                 | 14 <sup>th</sup>                                  | 0.7 (1.8)                    | 1.1 (2.5)                       | 2.6 (4.3)                  |         |                |
|                 | Δ-change (14 <sup>th</sup> from 7 <sup>th</sup> ) | -1.3                         | -3.1                            | -5.6                       | 0.043   | 0.07           |
|                 | Δ-change (14 <sup>th</sup> from 1 <sup>st</sup> ) | -9.3                         | -10.9                           | -6.9                       | 0.033   | 0.07           |

Based on 12 topics and 9 general symptoms. The severity based on 5-points Likert scale as: 0=none, 1=very mild, 2=mild, 3=moderate and 4=severe. Scores of mean changes were extracted as summing-up all symptoms intensity.

Comparisons of Δ-changes between the three groups were performed by using Kruskal-Wallis test.
